# Supplementary material
Source: bioRxiv or medRxiv preprint supplement (https://www.biorxiv.org/content/biorxiv/early/2020/11/08/2020.11.07.372714/DC4/embed/media-4.pdf)

## Supplemental Figure 1A. Primer list used to build Rel knockout and Rel complemented strain.

| Primers / Sequence                                                                | Description                                             | Purpose                                    |
|-----------------------------------------------------------------------------------|---------------------------------------------------------|--------------------------------------------|
| 761 5'-CTAACGCTGGTCGTGCATAA-3'                                                    | RP for downstream ZeoR cassette.                        | PCR sequence check for $\Delta rel$ strain |
| 762 5'-CCGAGGAGCAGGACTGAA-3'                                                      | FP for downstream ZeoR cassette.                        | PCR sequence check for $\Delta rel$ strain |
| 1424 5'-GTGCAGTTCAAGGACCTGACG-3'                                                  | FP for upstream $rel_{mab}$ gene.                       | PCR sequence check for $\Delta rel$ strain |
| 1425 5'-CCGAAGGAGACAGAGAAGTTCGT-3'                                                | RP for downstream $rel_{mab}$ gene.                     | PCR sequence check for $\Delta rel$ strain |
| 1233 5'-TGCGCAGACCTACCAGCTCGAATACGGCAC-3'                                         | FP for upstream flanking segment of $rel_{mab}$ gene.   | Making segment of $\Delta rel$ insert      |
| 1234 5'-TTAATCGCCTTGCAGCACAGCGATGAGCGGTTCC-3'                                     | RP for upstream flanking segment of $rel_{mab}$ gene.   | Making segment of $\Delta rel$ insert      |
| 1235 5'-ACCCTCATCGCTGTGCTGCAAGGCGATTAAGTTGG-3'                                    | FP for ZeoR cassette.                                   | Making segment of $\Delta rel$ insert      |
| 1236 5'-TGTTCAACCCGCTCATAAACAGCTATGACCATGATTAC-3'                                 | RP for ZeoR cassette.                                   | Making segment of $\Delta rel$ insert      |
| 1237 5'-TGGTCATAGCTGTTTATGAGCGGGTGAACATCTTGT-3'                                   | FP for downstream flanking segment of $rel_{mab}$ gene. | Making segment of $\Delta rel$ insert      |
| 1238 5'-GGCTCAAGGGTGAACCAACGACATCG-3'                                             | RP for downstream flanking segment of $rel_{mab}$ gene. | Making segment of $\Delta rel$ insert      |
| 1329 5'-CCGCATGCTTAATTAAGAAGGAGATATACATATGGCTGACGAGCAGCTGCCACGCGAG-3'             | FP for upstream $rel_{mab}$ gene.                       | Amplifying $rel$ gene for comp. strain     |
| 1330 5'-CCAATTAATTAGCTAAAGCTTCTACTTCTCGAACTGGGGTGGCTCCAGTCGGCGGCCGAGGTACCCGGTA-3' | RP for downstream $rel_{mab}$ gene.                     | Amplifying $rel$ gene for comp. strain     |

## Supplemental Figure 1B. Bacterial strains and Plasmids.

| Strain(s) or plasmid                          | Description                                                                                                                                                             | Boutte Lab Ref. # |
|-----------------------------------------------|-------------------------------------------------------------------------------------------------------------------------------------------------------------------------|-------------------|
| <u><i>E. coli</i> strains</u>                 |                                                                                                                                                                         |                   |
| DH5 $\alpha$ , TOP10                          | <i>E. coli</i> strains used for general cloning procedures.                                                                                                             |                   |
| <u><i>M. abscessus</i> strains</u>            |                                                                                                                                                                         |                   |
| ATCC19977                                     | Wild-type strain used for control purposes and as PCR template.                                                                                                         |                   |
| Mab/pNitRecET                                 | Transformed pCB207 into ATCC19977, used for recombineering purposes.                                                                                                    | BN-1              |
| Mab/pNitRecET $\Delta rel$ ::ZeoR             | <i>M. abscessus rel</i> gene knockout by insertion of ZeoR cassette by means of recombineering <sup>9</sup> . - Referenced in text as $\Delta rel_{mab}$ mutant strain. | BN-17             |
| Mab $\Delta rel$ ::ZeoR L5::pCT94- <i>rel</i> | Complementation strain - pCB1248 transformed into $\Delta rel_{mab}$ mutant strain.                                                                                     | BN-20             |
| <u>Plasmids</u>                               |                                                                                                                                                                         |                   |
| pCB207                                        | DH5 $\alpha$ / pNit-RecET-SacB-gent                                                                                                                                     |                   |
| pCB1248                                       | DH5 $\alpha$ / pCT94- <i>Rel</i> <sub>Mab</sub>                                                                                                                         |                   |

## Supplemental Figure 1C. Schematic of Rel knockout by mycobacterial recombineering system.

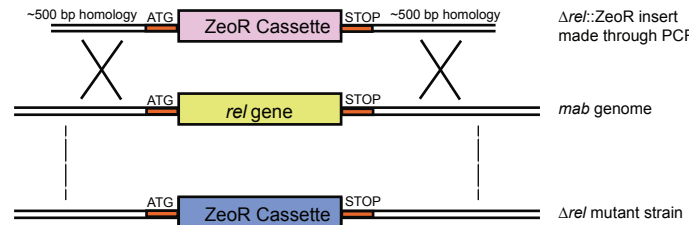

Supplement: Supplementary file [file media-4.pdf]
